# Supplementary material
Source: HighWire-hosted journal article supplement (https://bibliotheek.ehb.be/content/suppl/2015/04/20/openhrt-2014-000190)
Supplement: openhrt-2014-000190supp_appendix1.pdf [file openhrt-2014-000190supp_appendix1.pdf]

## Appendix 1

Tables 1.0 and 2.0 outline the assessments performed at each study visit.

**Table 1.0 Table of study assessments**

| Assessments                                              | Visits |                                                                                      |           |         |          |          |          |
|----------------------------------------------------------|--------|--------------------------------------------------------------------------------------|-----------|---------|----------|----------|----------|
|                                                          | S<br>V | BV<br>(a)                                                                            | BV<br>(b) | 6<br>Mo | 12<br>Mo | 18<br>Mo | 24<br>Mo |
| Screening/Eligibility                                    | √      |                                                                                      |           |         |          |          |          |
| Medical History/Demographics and concomitant medications |        | √                                                                                    |           |         |          |          |          |
| Consent                                                  |        | √                                                                                    |           |         |          |          |          |
| Ultrasound of AAA ( <b>Standard clinical care</b> )      | √      |                                                                                      |           | √       | √        | √        | √        |
| Clinical Assessment                                      |        | √                                                                                    |           | √       | √        | √        | √        |
| Pulse Wave analysis and velocity                         |        | √                                                                                    |           | √<br>** | √<br>**  | √<br>**  | √        |
| Blood sampling                                           |        | √                                                                                    |           | √<br>** | √<br>**  | √<br>**  | √        |
| CT scan of AAA *                                         |        | √                                                                                    |           |         |          |          | √        |
| MRI scan of AAA (pre-ferumoxytol)                        |        | √                                                                                    |           |         |          |          |          |
| I.V. administration of ferumoxytol                       |        | √                                                                                    |           |         |          |          |          |
| Post ferumoxytol MRI scan of AAA                         |        |                                                                                      | √         |         |          |          |          |
| AE/SAE Reporting                                         |        | 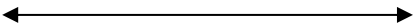 |           |         |          |          |          |

SV = surveillance clinic; BV(a) = Baseline visit part A (occurs within 1 month of SV); BV (b) Baseline visit part B; 24-36 hours after part (a);

- \* Where patients are to undergo elective repair of their aneurysms during follow up, a repeat CT scan may be performed prior to surgery.
- \*\* Bloods and pulse wave analysis will occur every 6 months in Edinburgh only. In other centres they will occur at baseline and 24 months only.

| Assessments                                                       | Visits |           |           |                     |                     |      |                |                |       |       |
|-------------------------------------------------------------------|--------|-----------|-----------|---------------------|---------------------|------|----------------|----------------|-------|-------|
|                                                                   | SV     | BV<br>(a) | BV<br>(b) | RP (a)<br>(1<br>Mo) | RP (b)<br>(1<br>Mo) | 6 mo | RP (a)<br>1 yr | RP (b)<br>1 yr | 18 Mo | 24 Mo |
| Screening/Eligibility                                             | √      |           |           |                     |                     |      |                |                |       |       |
| Medical<br>History/Demographics<br>and concomitant<br>medications |        | √         |           |                     |                     |      |                |                |       |       |
| Consent                                                           |        | √         |           |                     |                     |      |                |                |       |       |
| Ultrasound of AAA<br>(Standard clinical care)                     | √      |           |           |                     |                     | √    |                |                |       |       |
| Clinical Assessment                                               |        | √         |           | √                   | √                   | √    | √              | √              | √     | √     |
| Pulse Wave analysis and<br>velocity                               |        | √         |           |                     |                     | √    |                |                | √     | √     |
| Blood sampling                                                    |        | √         |           | √                   | √                   | √    | √              | √              | √     | √     |
| CT scan of AAA                                                    |        | √         |           |                     |                     |      |                |                |       | √     |
| MRI scan of AAA (pre-<br>ferumoxytol)                             |        | √         |           | √                   |                     |      | √              |                | √     | √     |
| I.V. administration of<br>ferumoxytol                             |        | √         |           | √                   |                     |      | √              |                |       |       |
